# Supplementary material for: Brief Report: Perspective Taking Deficits, Autism Spectrum Disorder, and Allaying Police Officers’ Suspicions About Criminal Involvement
Source: Springer Nature journal article supplement (doi:10.1007/s10803-019-03968-4), 2019-03-04
Supplement: MOESM1 [file 16525310]

**SUPPLEMENTAL MATERIALS**

Table S1

*Descriptive statistics for the VPA15, perspective taking scales, and extrication task performance for the ASD and non-ASD control sample*.

|  | Group | |
| --- | --- | --- |
| Scale | ASD  (*N* = 32) | Non-ASD  (*N* = 41) |
| A-ToM Physical |  |  |
| Mean | 6.8 | 8.1 |
| Standard deviation | 2.6 | 1.9 |
| 95% CIs | [5.9, 7.8] | [7.5, 8.7] |
| Cohen’s *d (&*95% CIs around *d)* | 0.54 [0.08, 1.02] | |
| Frith-Happé animations |  |  |
| Random |  |  |
| Mean | 3.4 | 3.6 |
| Standard deviation | 0.9 | 0.6 |
| 95% CIs | [3.0, 3.7] | [3.4, 3.8] |
| Cohen’s *d (&* 95% CIs around *d)* | 0.26 [-0.21, 0.72] | |
| Physical |  |  |
| Mean | 2.4 | 2.6 |
| Standard deviation | 1.1 | 0.8 |
| 95% CIs | [2.0, 2.8] | [2.3, 2.8] |
| Cohen’s *d (&* 95% CIs around *d)* | 0.18 [-0.28, 0.64] | |

**Extrication Task Scripts and Scoring Criteria**

Table S2

*Frith-Happé animations task practice trial instructions*

“Please select the type of interaction which best reflects the animation you just viewed: 1). No interaction: There is no obvious interaction between the triangles and movement appears random 2). Physical interaction: An interaction between the triangles in which actions are directed toward each other in order to achieve specific goals 3). Mental state interaction: An interaction between the triangles involving the manipulation of the emotions and thoughts of one triangle by the other.” Participants answered on the keyboard, and received feedback on their answer (e.g., ‘Your answer was incorrect. The animation type was 3. Mental state interaction: An interaction between the triangles involving the manipulation of the emotions and thoughts of one triangle by the other).

Table S3

*Extrication Scenario 1 and the Corresponding Scoring Criteria*

| The Tyre Lever | |
| --- | --- |
| Script | Scoring Criteria |
| You have a good friend Billy who lives next door to the mechanical workshop where you are employed.  He called you last Tuesday to ask if he could borrow your tyre-lever to fix the flat tyre on his car. A few days later you drop the lever off at his place after work. He greets you at the front door and invites you in for a beer. You pass him the tyre-lever and decline his invitation for a beer – you have to catch the 5:30 train to meet your mother for dinner. Anyway, your shoes are dirty and you don’t want to mess up his nice white carpet. Everyone makes fun of the dirty old shoes that you have been wearing since your first day at the workshop 5 years ago.  The next morning at work you are arrested. Apparently Billy was murdered on Tuesday night at around 7 pm and you were the last person to be seen visiting his house. Your fingerprints have been found on the  murder weapon - the tyre-lever. | All of the following: 4 points  3 of the following: 3 points  2 of the following: 2 points  1 of the following: 1 point  Story recounted: 1 point  *Didn’t go in the house as I had on dirty/soiled work boots that I wear every day.*  *States the tyre lever was theirs OR that they were lending Billy the lever OR that it came from the workshop.*  *Mentions they Caught a train after seeing Billy* ***AND*** *either the time of the train* ***or*** *that there would be CCTV footage of them on the train* ***or*** *they have a train ticket* ***or*** *there may have been witnesses on the train.*  *Mentions dinner with mother that night*. |

Table S4

*Extrication scenario 2 and the corresponding scoring criteria*

| Child Pornography | |
| --- | --- |
| Script | Scoring Criteria |
| You typically share a home with your brother and one of his mates. When you first moved in two years ago, your parents bought you and your brother a computer to use because you were attending university. You no longer use the computer and have lent it to your brother’s mate who lives with you. You haven’t used it in over a year and your brother’s mate has changed the passwords.  Over the past month, you have been staying at your sister’s house as her husband is away and she doesn’t like to be home alone. While at your sister’s house you celebrate your niece’s 3rd birthday party. You have a new smartphone with a high megapixel camera and so your sister asks if she could use it to capture photos of the girls playing games and splashing around in the paddling pool. It was a lovely day.  While heading out to get milk that evening, you leave your phone in the supermarket. Someone finds the phone and when they open it to try and find out your identity, they see images of young children in bathers. The police attend your flat where you typically reside with your brother and his mate and seize your computer. They find images of child pornography on the computer – these images had been downloaded in the past few weeks. | All of the following: 4 points  3 of the following: 3 points  2 of the following: 2 points  1 of the following: 1 point  Story recounted: 1 point  *Mentions that the images were taken by their sister at her daughter’s pool party.*  *Hasn’t used the computer for over a year as lent it to brother’s friend.*  *Doesn’t know the passwords anymore.*  *Have not lived at that address for a month.* |

Table S5

*Scenario 3 and the Corresponding Scoring Criteria*

| The Train | |
| --- | --- |
| Script | Scoring Criteria |
| You are sitting on a train with three of your mates. You’re chatting and laughing when two teenage boys walk down the aisle. One of them accidently trips over one of your mate’s feet. Your mate apologizes, but the boy is not happy. The boys sit down a few rows behind you and you can hear them muttering insults at your group. Feeling the tension rise, you convince your mates to move carriages.  Ten minutes later you all get off the train. You’re walking along the platform when you see your Mum’s good friend on the opposite side of the platform. You are waving at each other when you hear a fight break out behind you. It is between your friends and the two boys from the train. The two boys start running and your mates chase after them. Unsure what to do you run after everyone yelling “STOP” in an attempt to stop your friends from chasing and possibly even fighting with the boys. You are too late, and one of your mates has hit one of the boys. You pull out your phone to call for help, but your call fails – you must be out of credit.  You were later identified on CCTV chasing the two boys along with your mates and are charged with aggravated assault. | All of the following: 4 points  3 of the following: 3 points  2 of the following: 2 points  1 of the following: 1 point  Story recounted: 1 point  *Indicates they were chasing the boys to try and stop friends* ***OR*** *yelled stop to stop the boys and witnesses may have heard.*  *Mum’s friend may have witnessed what happened* ***OR*** *was waving to Mum’s friend when the fight broke out.*  *Indicates attempt to diffuse tension on the train* ***OR*** *mentions CCTV footage of group changing carriages* ***OR*** *mentions there may have been witnesses of the events on the train.*  *Mentions attempt to phone for help.* |

Table S6

*Scenario 4 and the Corresponding Scoring Criteria*

| The Movies | |
| --- | --- |
| Script | Scoring Criteria |
| You’re meeting your friend at the cinema for a 6pm movie. You’re on the bus, but you don’t think you will make it on time as the bus is running late. By the time you get off, you only have five minutes to get to the cinema before the movie starts. Your friend can’t go into the movie without you because you pre-bought the tickets online, which are in your pocket.  It is raining heavily and you wished you had an umbrella but you place your jacket-hood over your head. Whilst running you pass a friend from work. You tell her that you’re late for a movie and that you’re sorry you can’t stop and chat. You carry on running but decide to take a shortcut. Instead of taking the main route down the shopping strip, you head down a side street, around a bend and through the car park behind the cinema. You make it to the cinema with one minute to spare.  The next day you find out a person was reported dealing drugs to youths in the car park behind the cinema. You have been identified by CCTV footage running through the car park and are now under suspicion of being the dealer. The reason for the link is that an eye-witness has described the drug-dealer with a physique similar to yours and a hood over their head, so their face was unidentifiable | All of the following: 4 points  3 of the following: 3 points  2 of the following: 2 points  1 of the following: 1 point  Story recounted: 1 point  *Mentions they were on a bus just moments before* ***OR*** *they have a bus ticket from just before* ***OR*** *CCTV footage from the bus* ***OR***  *bus driver witnesses/ patron witnesses on bus.*  *Mentions they were running because they were late for the movie* ***OR*** *they were running with hood over head because it was raining.*  *Pre-purchased online movie tickets* ***AND***  *may still have them, or an online receipt.*  *Saw a friend from work on the way.* |

Table S7

*Scenario 5 and the Corresponding Scoring Criteria*

| Laboratory Equipment | |
| --- | --- |
| Script | Scoring Criteria |
| You are a science student at university. You volunteer in the laboratories for course credit, which requires you to spend two hours a week working in the labs. You’ve recently sprained your ankle and are on crutches, so you’ve mainly been doing computer related work.  It is approaching the end of the semester and your exams are in a week. You decide to do some of your volunteering early on Tuesday morning to free up your day for exam revision. It is 8am when you arrive at the labs and they are not yet open. You haven’t got your own key for out-of-hours access, but luckily someone is already there and lets you in. Once you’ve finished you head to the library. At 4pm you get a lift home with a friend – you cannot drive at the moment because of your ankle. You spend the rest of the night at home studying with your flat mates.  On Wednesday morning you arrive at university early to finish your volunteering hours. When you get to the labs, the doors are already open and you see security and staff members inside. You soon find out that over $1000 worth of lab equipment was stolen last night. The thieves were seen running away with the equipment. All staff and volunteers are under suspicion as there were no signs of forced entry, so the thieves must have had a key. | All of the following: 4 points  3 of the following: 3 points  2 of the following: 2 points  1 of the following: 1 point  Story recounted: 1 point  *Indicates they were on crutches and therefore could not run with lab equipment.*  *Doesn’t have a key for out of hours’ access.*  *Left uni at 4pm with a friend.*  *Studied that night with flat mates*. |

Table S8

*Inter-correlations of perspective taking, VCI, memory and extrication measures for ASD and non-ASD samples combined*

| Measure | 1. | 2. | 3. | 4. | 5. | 6. |
| --- | --- | --- | --- | --- | --- | --- |
| 1. A-ToM social | - | .10 | .31* | .33** | .19 | .46** |
| 2. Frith-Happé mental |  | - | .70** | .09 | .18 | .01 |
| 3. Frith-Happé feelings |  |  | - | .29* | .21 | .28* |
| 4. WASI-II VCI |  |  |  | - | .32** | .21 |
| 5. VPA15 |  |  |  |  | - | .34** |
| 6. Extrication |  |  |  |  |  | - |

**p* < .05, ** *p* < .01 (2-tailed)

*Partial inter-correlations of perspective taking and extrication measures for ASD and non-ASD samples combined with VCI and VPA15 controlled*

| Measure | 1. | 2. | 3. | 4. |
| --- | --- | --- | --- | --- |
| 1. A-ToM social | - | .06 | .23 | .42** |
| 2. Frith-Happé mental |  | - | .70** | -.07 |
| 3. Frith-Happé feelings |  |  | - | .21 |
| 4. Extrication |  |  |  | - |

**p* < .05, ** *p* < .01 (2-tailed)
